# Supplementary material
Source: publisher site journal article supplement (https://www.dovepress.com/article/513667)
Supplement: Supplementary file 1 [file get_supplementary_file.php]

**Complete version of questionnaire**

Informed Consent

Dear Anesthesia Experts,

We sincerely invite you to participate in this survey. The focus of this survey is not on the quantity of responses, but on the quality. Please take the time to carefully read each question and respond thoughtfully.

1.Purpose of the Survey: The purpose of this survey is to assess the current status of clinical research among anesthesiologists in China and to improve the quality of this academic event. It will take approximately 5 minutes of your time, and we greatly appreciate your valuable support.

2.Survey Content:

(1) Personal basic information

(2) Current status of clinical research

(3) Suggestions for this academic event

3.Confidentiality Principle: The survey is anonymous. We will strictly protect your information, and no identifiable personal data will be used in the analysis, publication, or dissemination of results. All responses will be managed by the research team and stored securely, for internal analysis only. Your information will not be disclosed.

4.Benefits and Risks: Completing this survey may take a small amount of your work or personal time, but it is of great significance in advancing the level of clinical scientific research in anesthesiology in China.

5.Voluntary Participation: Your participation is entirely voluntary, and you can withdraw from the survey at any time. We respect your decision. If you have any questions regarding the survey, please feel free to contact Dr. Du at: 17602428628.

Your support is crucial in improving the level of clinical research in Chinese anesthesiology. Once again, we thank you for your participation and support!

Sincerely,

Chinese Society of Cardiothoracic and Vascular Anesthesia

Perioperative Infection Control Branch

Beijing Society of Anesthesiology, Perioperative Infection Control Working Group

Beijing Society of Anesthesiology, Day Surgery Anesthesia Group

1.Participant Statement: I have read the informed consent form, had the opportunity to ask questions, and all my questions have been answered. [Single choice question]

○ I agree to the above informed consent form and voluntarily participate in the survey (automatically proceeds to the survey)

○ I do not agree to participate in the survey (automatically exits the survey)

1. Your Gender: [Single choice question]

○ Male

○ Female

1. Your Age Range: [Single choice question]

○ 21-30

○ 31-40

○ 41-50

○ 51-60

○ Over 60

1. Please Specify Your City: _______________[Short answer]

5. Hospital Level: [Single choice question]

○ Tertiary Class A

○ Tertiary Class B

○ Secondary Class A

○ Secondary Class B

○ Other

1. Hospital Type: [Single choice question]

○ Public Hospital

○ Private Hospital

1. Is your hospital a teaching hospital? [Single choice question]

○ Yes

○ No

1. Highest Education/Qualification: [Single choice question]

○ Associate Degree

○ Bachelor's Degree

○ Master's Degree

○ Doctorate

1. Professional Title: [Single choice question]

○ Resident Physician

○ Attending Physician

○ Associate Chief Physician

○ Chief Physician

1. Are you a graduate advisor? [Single choice question]

○ No

○ Master's Degree Advisor

○ Doctoral Degree Advisor

1. Have you ever published a clinical research paper as the first author or corresponding author? [Multiple choice question]

□ Published a paper in Chinese

□ Published a paper in English

□ Have not published any clinical research papers yet

1. What stage is your clinical research currently at? [Single choice question]

○ Interested and currently implementing

○ Interested but not yet implemented

○ Completely uninterested

1. Have you participated in or initiated any clinical research projects? [Single choice question]

○ Have participated

○ Have initiated

○ Have not participated/initiated any clinical research projects

1. If there were no external pressures, such as promotion pressure, employment pressure, graduation pressure, departmental assessment pressure, etc., would you be willing to independently engage in clinical research? [Single choice question]

○ Yes

○ No

1. In Chinese culture, the number "顺顺顺" (meaning smooth or harmonious) is often represented by which of the following numbers? [Single choice question]

○ 222

○ 555

○ 666

○ 888

1. Have you ever actively participated in formal clinical research-related training in the past? [Single choice question]

○ Yes

○ No

1. Would you be willing to participate in clinical research training currently? [Single choice question]

○ Yes

○ No

1. What motivates you to engage in clinical research? (Multiple choices allowed) [Multiple choice question]

□ Professional title promotion

□ Graduation requirement

□ Departmental assessment

□ Solving clinical problems

□ Satisfaction from publishing papers

□ Receiving research rewards

□ Other (please specify): ___________

1. What are your weaknesses in clinical research capabilities? (Multiple choices allowed) [Multiple choice question]

□ Literature review

□ Lack of ideas

□ Research design

□ Project implementation

□ Statistical analysis

□ Paper writing

1. What are the main difficulties you face in conducting clinical research? (Multiple choices allowed) [Multiple choice question]

□ Lack of time

□ Lack of ability

□ Lack of funding

□ Lack of motivation

□ Other (please specify): ___________

1. Which of the following training do you urgently need? (Multiple choices allowed) [Multiple choice question]

□ How to choose a research topic

□ How to conduct literature searches and read research papers

□ How to undergo ethical review

□ How to register a clinical trial

□ How to design a research project

□ Key points in implementing clinical trials

□ How to perform statistical analysis

□ How to write a research paper

□ How to submit a paper for publication

□ How to respond to reviewers' comments
